# Supplementary material for: SNHG25 promotes colorectal cancer metastasis by regulating MMP2
Source: Aging (Albany NY). 2023 Sep 25;15(19):10105–16. doi: 10.18632/aging.205060 (PMC10599716; doi:10.18632/aging.205060)
Supplement: Supplementary Figures [file aging-15-205060-s001.pdf]

## SUPPLEMENTARY FIGURES

### Supplementary Figures

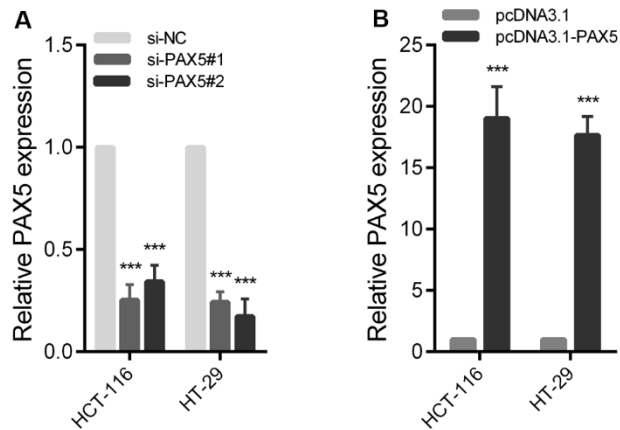

**Supplementary Figure 1.** (A) PAX5 expression was detected by qRT-PCR in HCT-116 cells transfected with PAX5 siRNAs. (B) PAX5 expression was detected by qRT-PCR in HCT-116 cells transfected with pcDNA3.1-PAX5. \*\*\*P < 0.001.

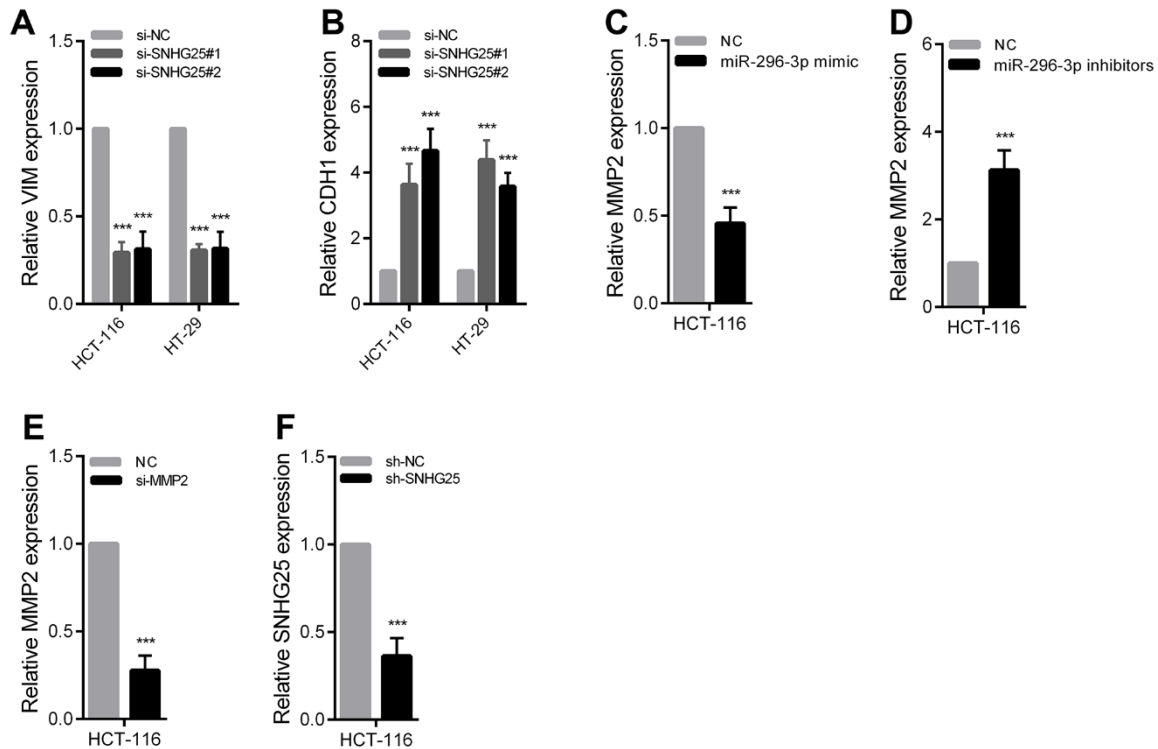

**Supplementary Figure 2.** (A, B) VIM and CDH1 expression was detected by qRT-PCR in HCT-116 cells after SNHG25 knockdown. (C) MMP2 expression was detected by qRT-PCR after transfection of miR-296-3p mimics in HCT-116 cells. (D) MMP2 expression was detected by qRT-PCR after transfection of miR-296-3p inhibitors in HCT-116 cells. (E) MMP2 expression was detected by qRT-PCR in HCT-116 cells after transfection with MMP2 siRNAs. (F) SNHG25 expression was detected by qRT-PCR in tissues stably transfected sh-SNHG25 and sh-NC plasmid. \*\*\*P < 0.001.
